# Supplementary material
Source: publisher site journal article supplement (https://www.dovepress.com/article/297536)
Supplement: Supplementary file 1 [file get_supplementary_file.php]

## Supplementary material

### **Checklist for In-Situ Simulation for Covid-19 Management**

#### **Pre-program:**

- Program planning with scientific script
- Team formation with administration approval
- Venue arrangement
- Invitation to participants and viewers
- Learning materials for demonstrators to deliver scientific dialogues of COVID-19 management during each steps of the program
- Relevant documents to be handled in screening of COVID-19 suspected patients as per National and International guidelines
- Materials to handle laboratory diagnosis, Infection Control Practices and Biomedical Waste Management by the demonstrators
- Rehearsal schedule
- Assessment materials pre-test, post-test question paper, feedback forms etc.

#### **Program:**

- Time management for each step of methodology
- Schedule for moderator and demonstrators
- Collection of assessment and feedback forms
- Rearrange the venue

#### **Post-program:**

- Debriefing session time and schedule
- Agenda of the debriefing session
- Evaluation of assessment and feedback of participants
- Analyse the defaults happened in the program and the remedial steps for subsequent program
- Minutes of the meeting
